# Supplementary material for: Apple Polyphenol Extract Suppresses Clostridioides difficile Infection in a Mouse Model
Source: MDPI journal article supplement (doi:10.3390/metabo12111042), 2022-10-30

## Supplemental Material

**Supplementary Table. S1. PCR primers.**

| Gene                  | Forward Sequence (5'-3') | Reverse Sequence (5'-3') |
|-----------------------|--------------------------|--------------------------|
| Bacteria16S rRNA V3V4 | TACGGRAGGCAGCAG          | AGGGTATCTAATCCT          |
| <i>β-actin</i>        | AGTGTGACGTTGACATCCGT     | GCAGCTCAGTAACAGTCCGC     |
| <i>Occludin</i>       | TTCTCTGACCTTGAGTGTGG     | CTCTTGCCCTTTCTGCTTT      |
| <i>ZO-1</i>           | GCCGCTAAGAGCACAGCAA      | GCCCTCCTTTTAACACATCAGA   |

Supplementary Figure S1. H&E scores of colonic tissues of mice in each group.

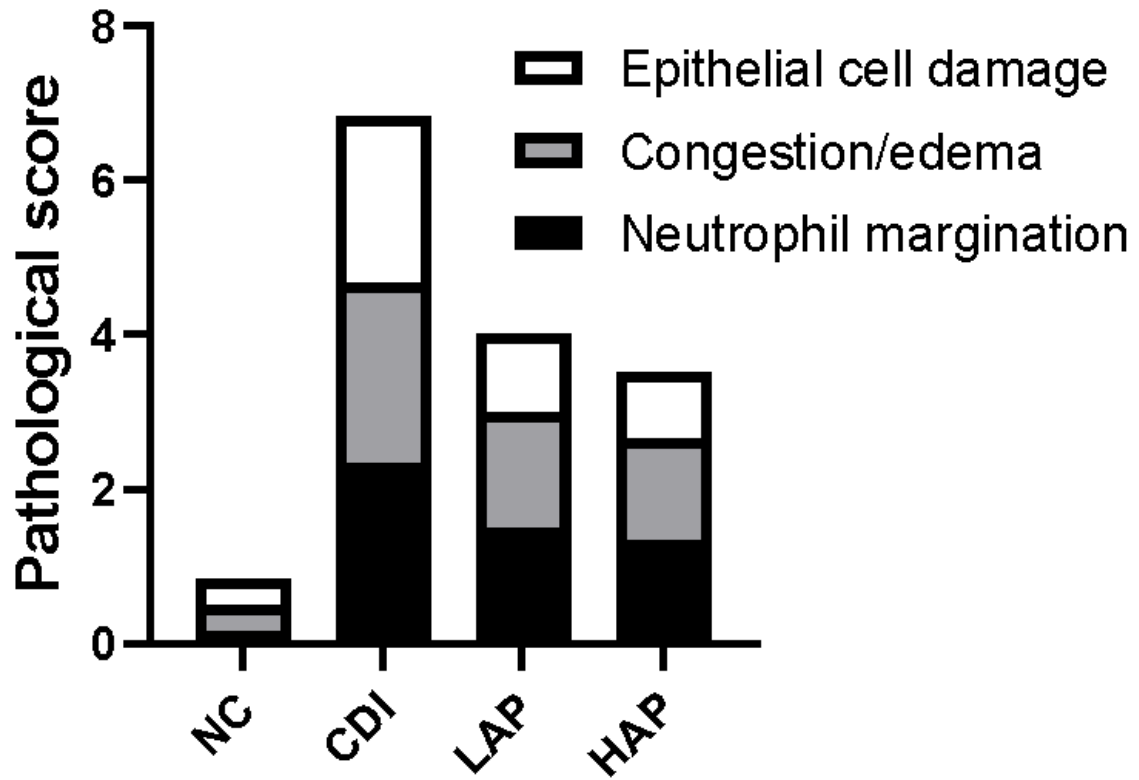



**Supplementary Figure S3. Relative abundance of abundant taxa at phylum, family, and genus level.**

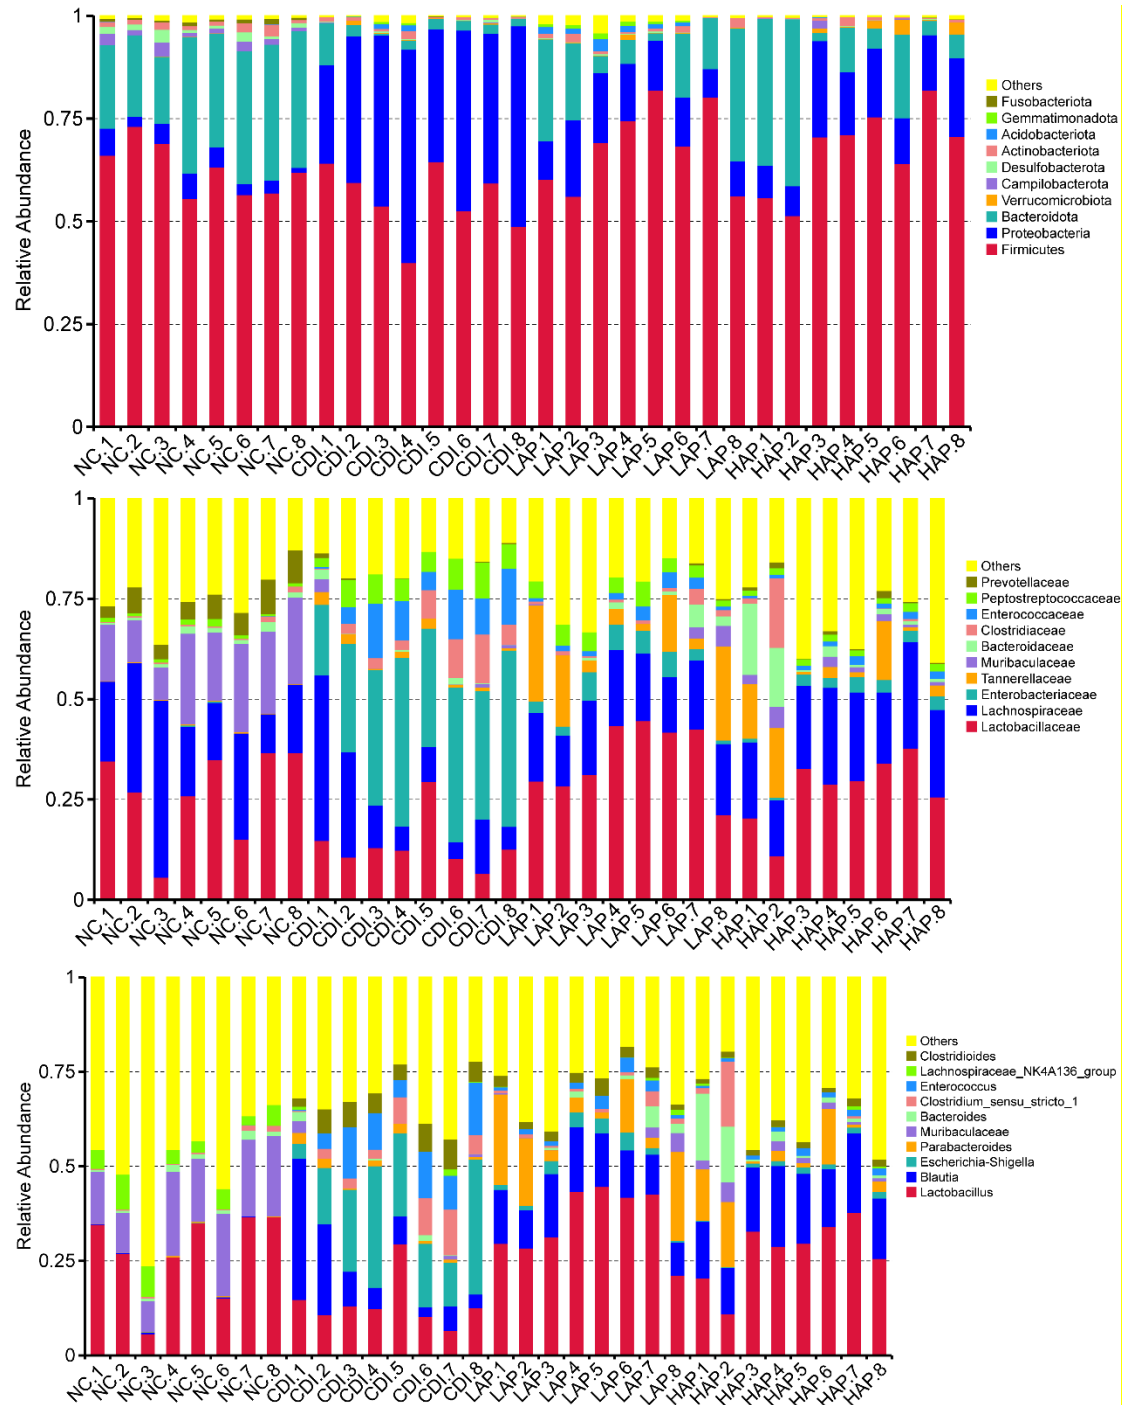

**Supplementary Figure S4. OPLS-DA plot showing the metabolic profiles of the CDI and LAP groups.**

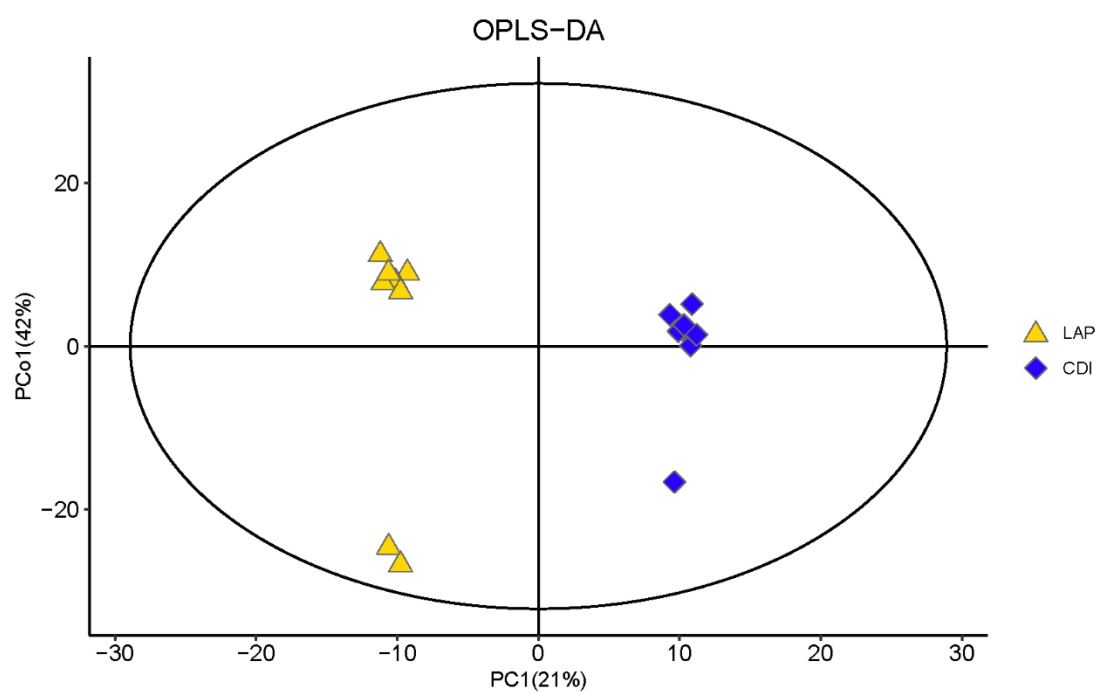

Supplementary Figure S5. Heatmap of differential metabolites between the HAP and CDI groups.

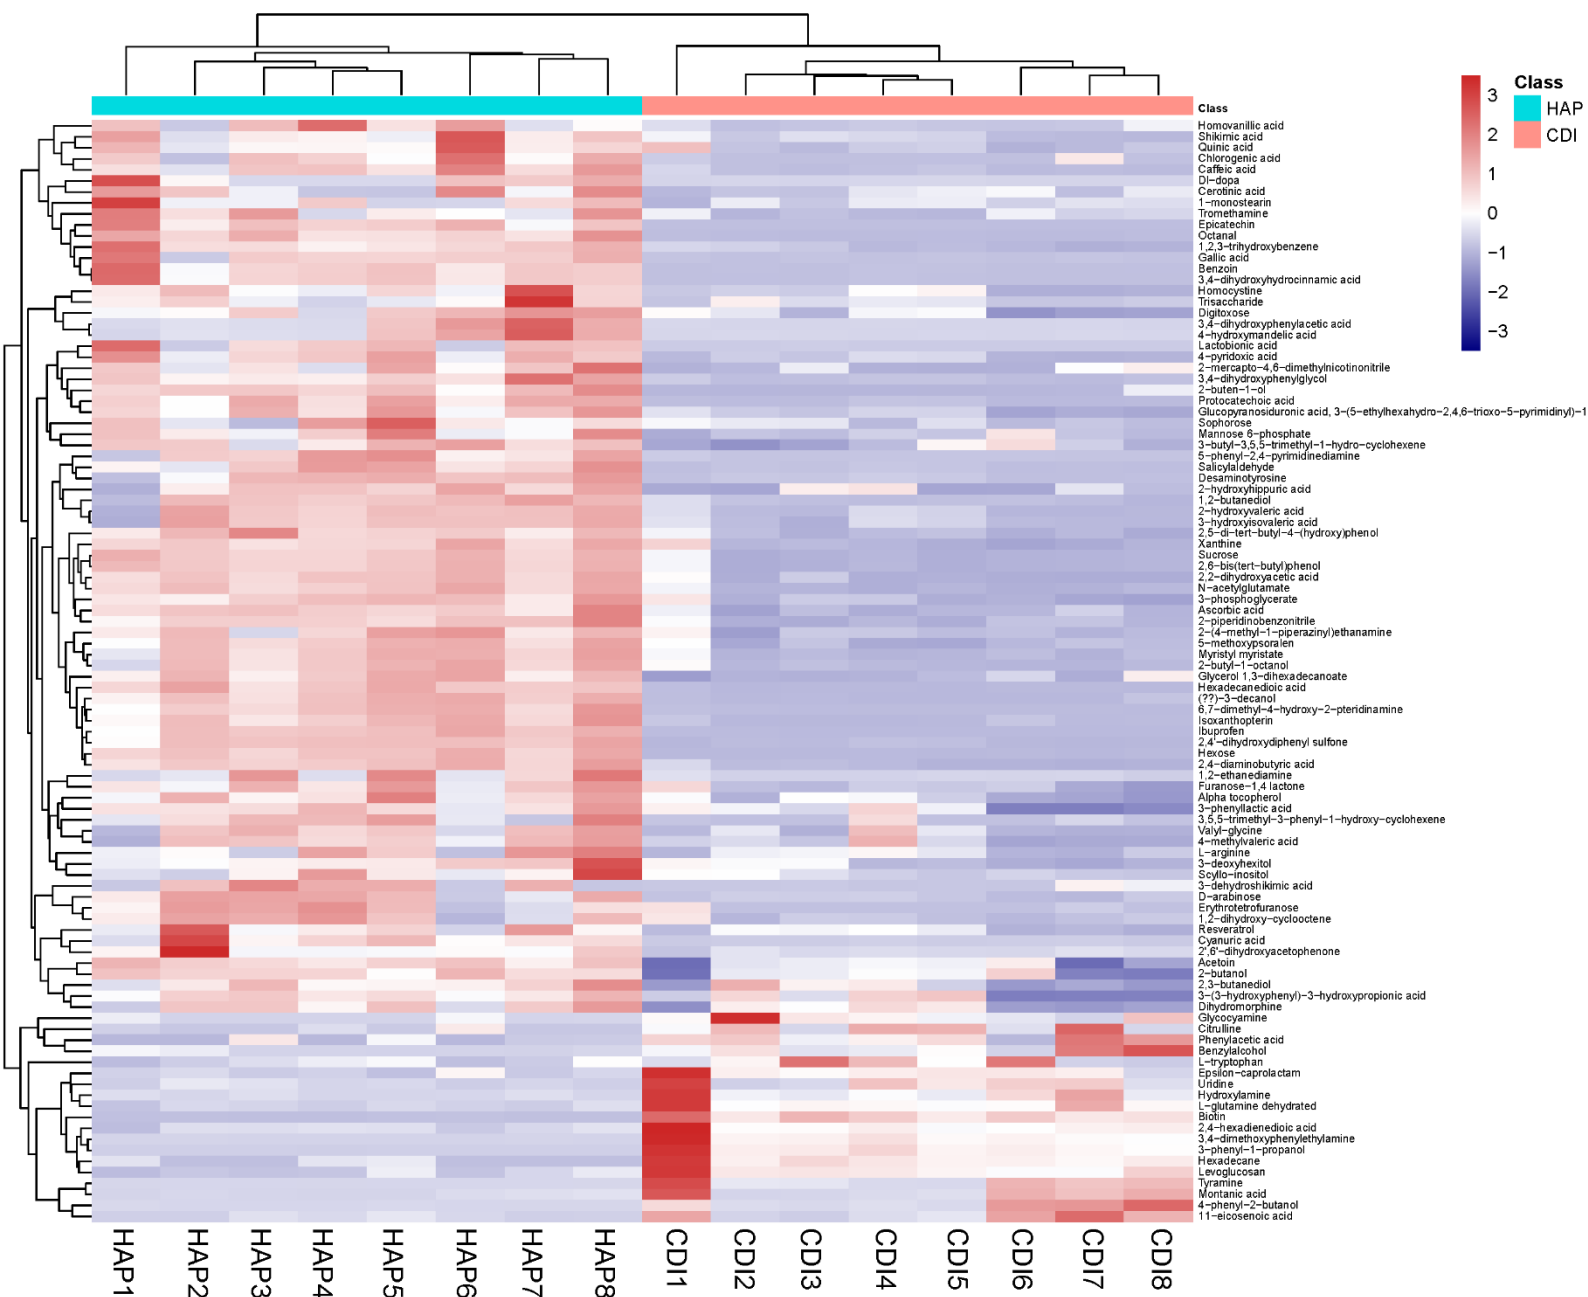

Supplementary Figure S6. Heatmap of differential metabolites between groups.

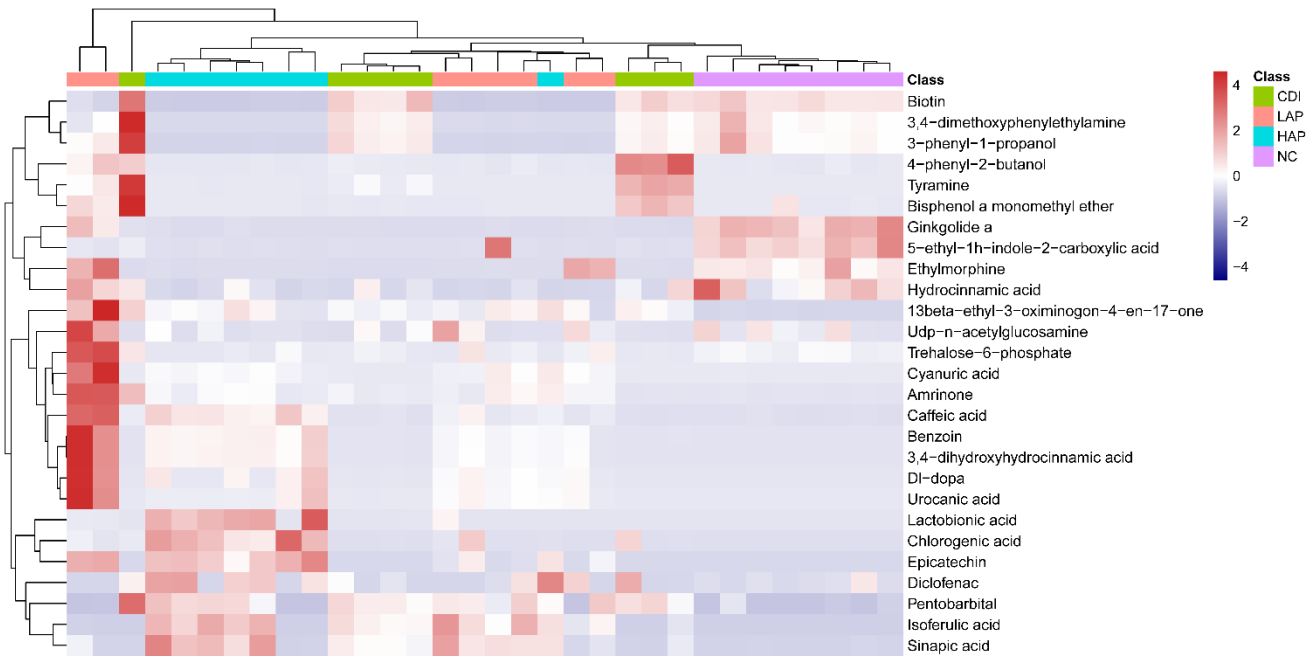

**Supplementary Figure S7. The levels of SCFAs between different groups.** The data are expressed as the mean  $\pm$  SEM. \*,  $P < 0.05$ ; \*\*,  $P < 0.01$ ; \*\*\*,  $P < 0.001$ ; and \*\*\*\*,  $P < 0.0001$ .

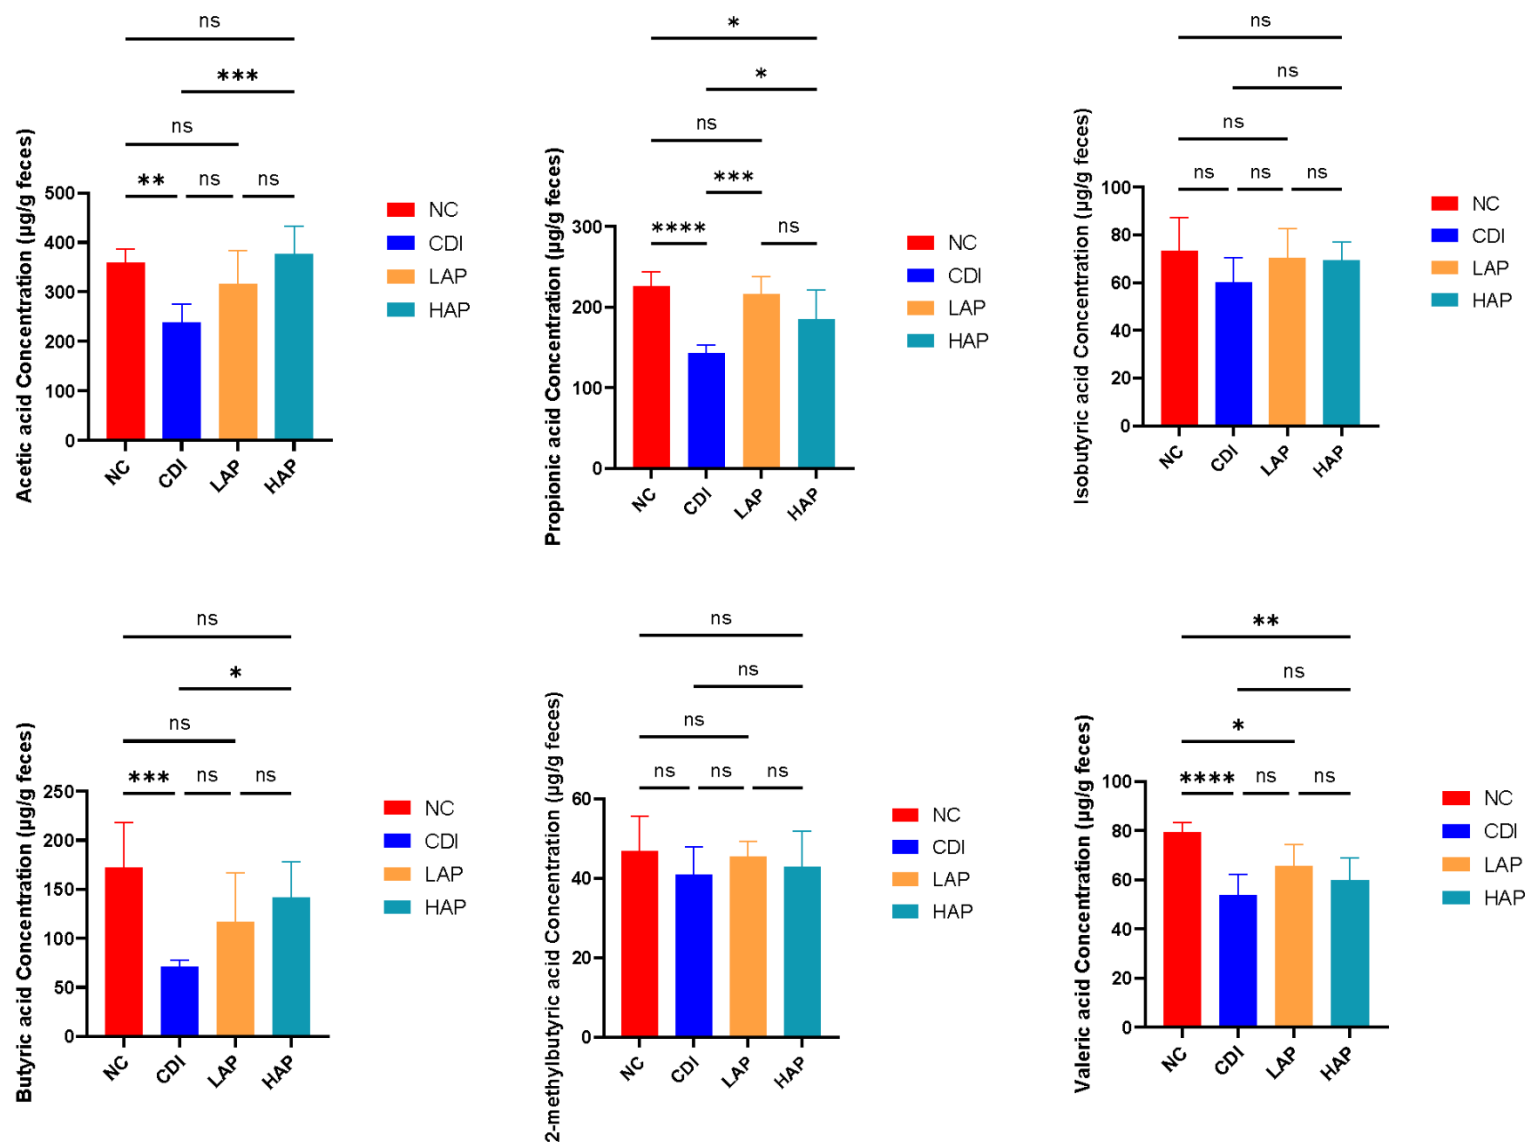

Supplement: s1 [file s1]
